# Supplementary material for: Central metabolism of functionally heterogeneous mesenchymal stromal cells
Source: PubMed Central journal article supplement (PMC6817850; doi:10.1038/s41598-019-51937-9), 2019-10-28
Supplement: 41598_2019_51937_MOESM1_ESM.pdf [file 41598_2019_51937_MOESM1_ESM.pdf]

# Central metabolism of functionally heterogeneous mesenchymal stromal cells

Mario Barilani<sup>1,2,\*</sup>, Roberta Palorini<sup>3,\*</sup>, Giuseppina Votta<sup>3,4</sup>, Roberta Piras<sup>1</sup>, Giuseppe Buono<sup>1</sup>, Michela Grassi<sup>5</sup>, Valentina Bollati<sup>2</sup>, Ferdinando Chiaradonna<sup>3,#</sup> and Lorenza Lazzari<sup>1,#</sup>

<sup>1</sup>Laboratory of Regenerative Medicine – Cell Factory, Department of Transfusion Medicine and Hematology, Fondazione IRCCS Ca' Granda Ospedale Maggiore Policlinico, Via F. Sforza 35, 20122 Milano (MI), Italy

<sup>2</sup>EPIGET laboratory, DISCCO department, University of Milan, Via Festa del Perdono 7, 20122 Milano (MI), Italy

<sup>3</sup>Department of Biotechnology and Biosciences, University of Milano-Bicocca, Milan, 20126, Italy

<sup>4</sup>Joint Research Unit ISBE-IT Institute of Molecular Bioimaging and Physiology, National Research Council (IBFM-CNR), Segrate, MI, Italia

<sup>5</sup>Laboratory of Transplant Immunology, UOC Transplant Coordination, Fondazione IRCCS Ca' Granda Ospedale Maggiore Policlinico, Via F. Sforza 35, 20122 Milano (MI), Italy

\* These authors contributed equally to this work

# To whom correspondence should be addressed: [lorenza.lazzari@policlinico.mi.it](mailto:lorenza.lazzari@policlinico.mi.it) and [ferdinando.chiaradonna@unimib.it](mailto:ferdinando.chiaradonna@unimib.it)

Email addresses of all authors:

[m.barilani@gmail.com](mailto:m.barilani@gmail.com); [roberta.palorini@unimib.it](mailto:roberta.palorini@unimib.it); [giuseppina.votta@unimib.it](mailto:giuseppina.votta@unimib.it); [robi.piras91@gmail.com](mailto:robi.piras91@gmail.com); [giuseppe.buono@policlinico.mi.it](mailto:giuseppe.buono@policlinico.mi.it); [michela.grassi@policlinico.mi.it](mailto:michela.grassi@policlinico.mi.it); [valentina.bollati@unimi.it](mailto:valentina.bollati@unimi.it); [ferdinando.chiaradonna@unimib.it](mailto:ferdinando.chiaradonna@unimib.it); [lorenza.lazzari@policlinico.mi.it](mailto:lorenza.lazzari@policlinico.mi.it).

**A**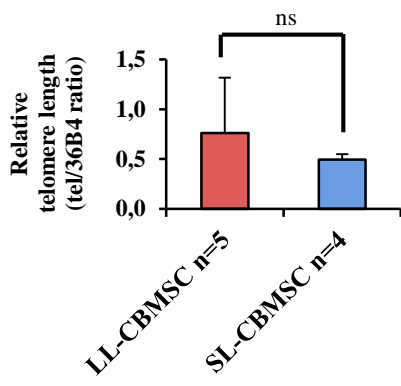**B**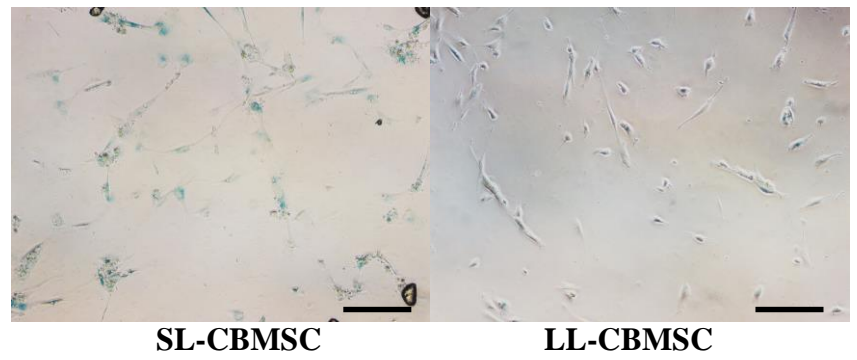**C**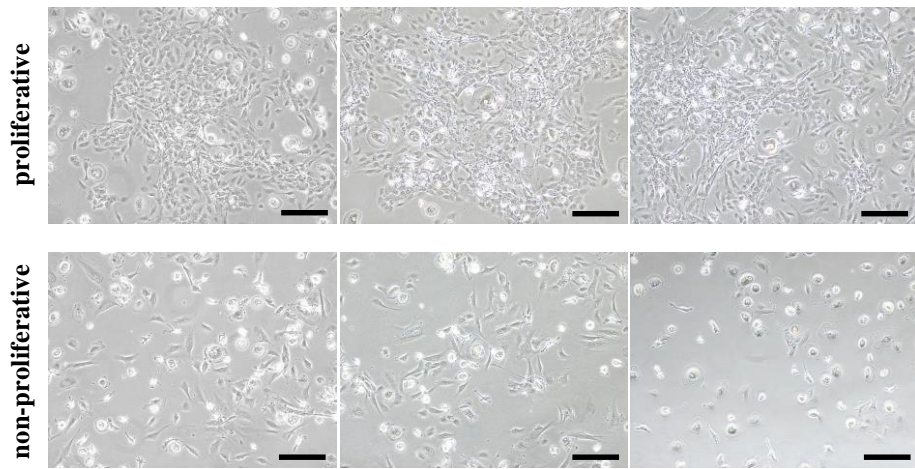**D**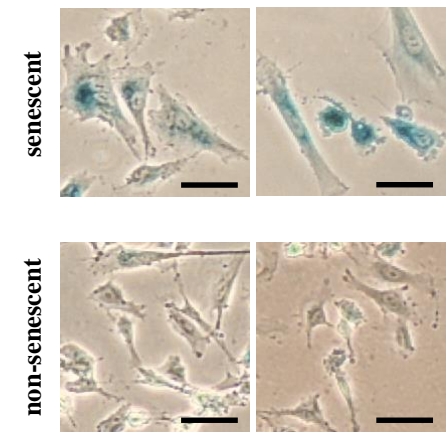**E**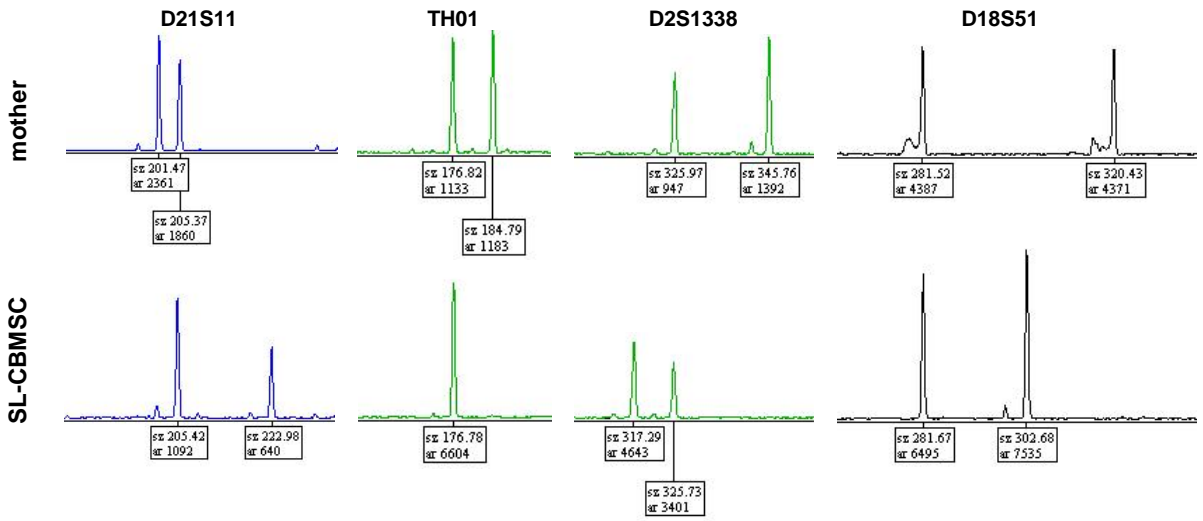

**Supplementary figure 1. LL- and SL-CBMSC show similar telomere length at P5 and different senescence status in spite of absence of maternal cell contamination.** Histograms show relative telomere length (A); tel, telomere sequences; 36B4, single copy gene; ns, statistically not significant (Student's t-test); mean and standard deviation are represented. Representative images of P5 SL-CBMSC and LL-CBMSC stained to assess  $\beta$ -galactosidase activity (B). Scale bar 200  $\mu$ m. Representative images of CBMSC colonies formed by more proliferative (proliferative) or less proliferative (non-proliferative) cells at P0 (C). Scale bar 200  $\mu$ m. Representative images of  $\beta$ -galactosidase-negative (non-senescent) or positive (senescent) CBMSC clusters (D). Scale bar 100  $\mu$ m. Representative SL-CBMSC short tandem repeat profile compared to that obtained from the DNA of the mother for 4 out of 15 analyzed loci (E).

**A**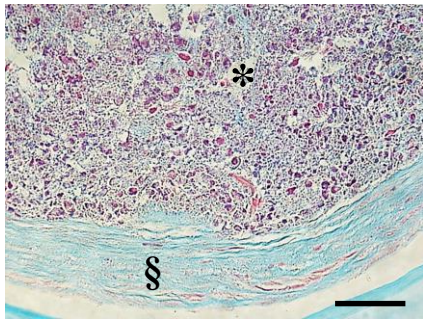**LL-CBMSC**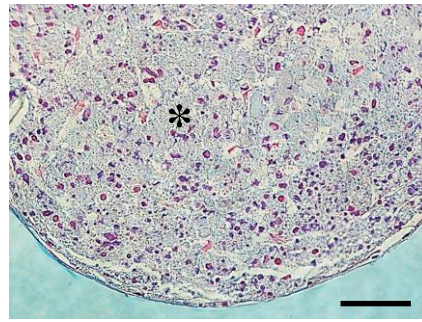**SL-CBMSC****B**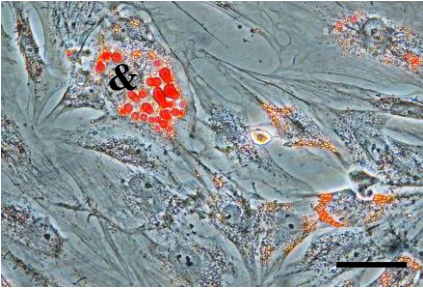**LL-CBMSC**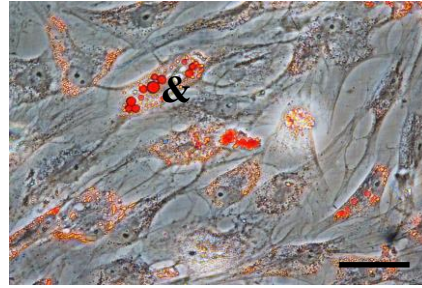**SL-CBMSC**

**Supplementary figure 2. LL- and SL-CBMSC chondrogenic and adipogenic potential.** Representative images of histological analysis of LL-CBMSC and SL-CBMSC chondrogenic cell pellets, stained by hematoxylin-eosin and alcian blue (A). Scale bar: 100  $\mu\text{m}$ ; \* indicates undifferentiated cell pellet core, § indicates Alcian blue-positive chondromyxoid fibrotic tissue cuticle. Representative images of LL- and SL-CBMSC differentiated toward the adipogenic lineage, stained by Oil Red O (B). Scale bar: 50  $\mu\text{m}$ ; & indicates Oil Red O-positive lipid droplets.

A

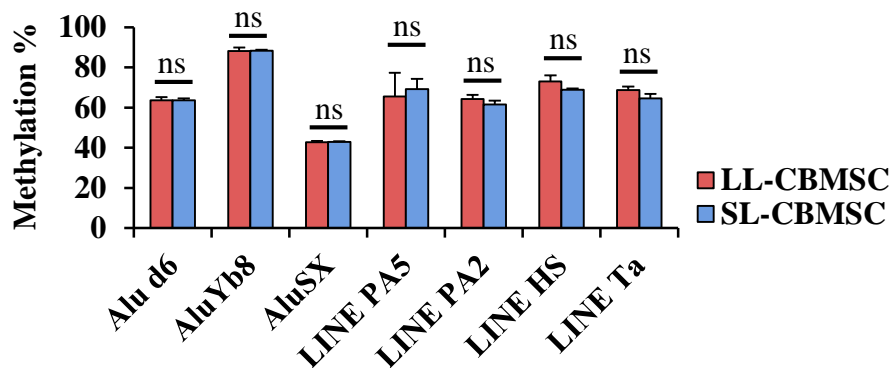

B

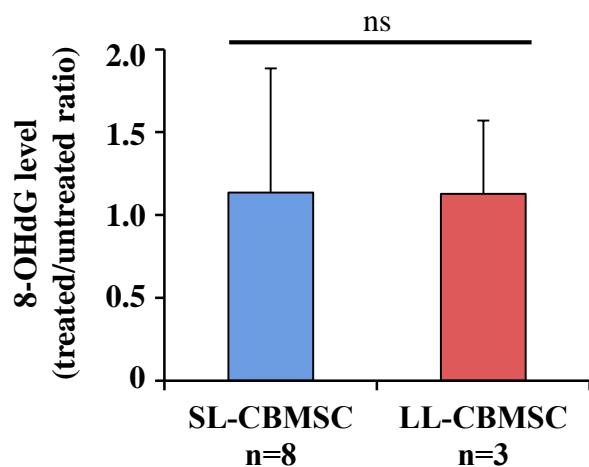

C

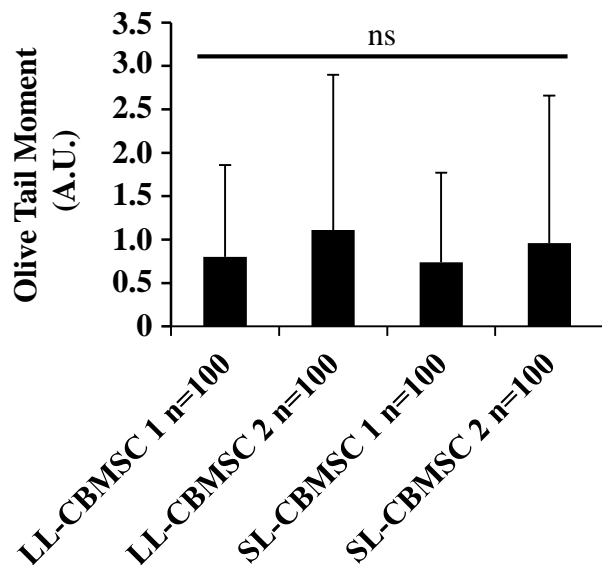

**Supplementary figure 3. LL- and SL-CBMSC do not show significant difference in nuclear DNA global methylation and oxidative damage.** Different LINE and SINE repeated sequences were analyzed as an estimation of global nuclear DNA methylation (A). Ns, not statistically significant (Student's t-test, LL-CBMSC vs. SL-CBMSC). The presence of 8-OHdG oxidative stress-associated DNA lesions on mitochondrial DNA was addressed by hOGG1 enzyme digestion and subsequent qPCR (B). Ns, not statistically significant (Student's t-test, LL-CBMSC vs. SL-CBMSC). Also single cell-gel electrophoresis and calculation of olive tail moment indicative of oxidative stress-associated genome fragility were performed (C). Ns, not statistically significant (one-way ANOVA followed by Holm-Sidak's post-hoc multiple comparisons test). In all figures mean and standard deviation are represented.

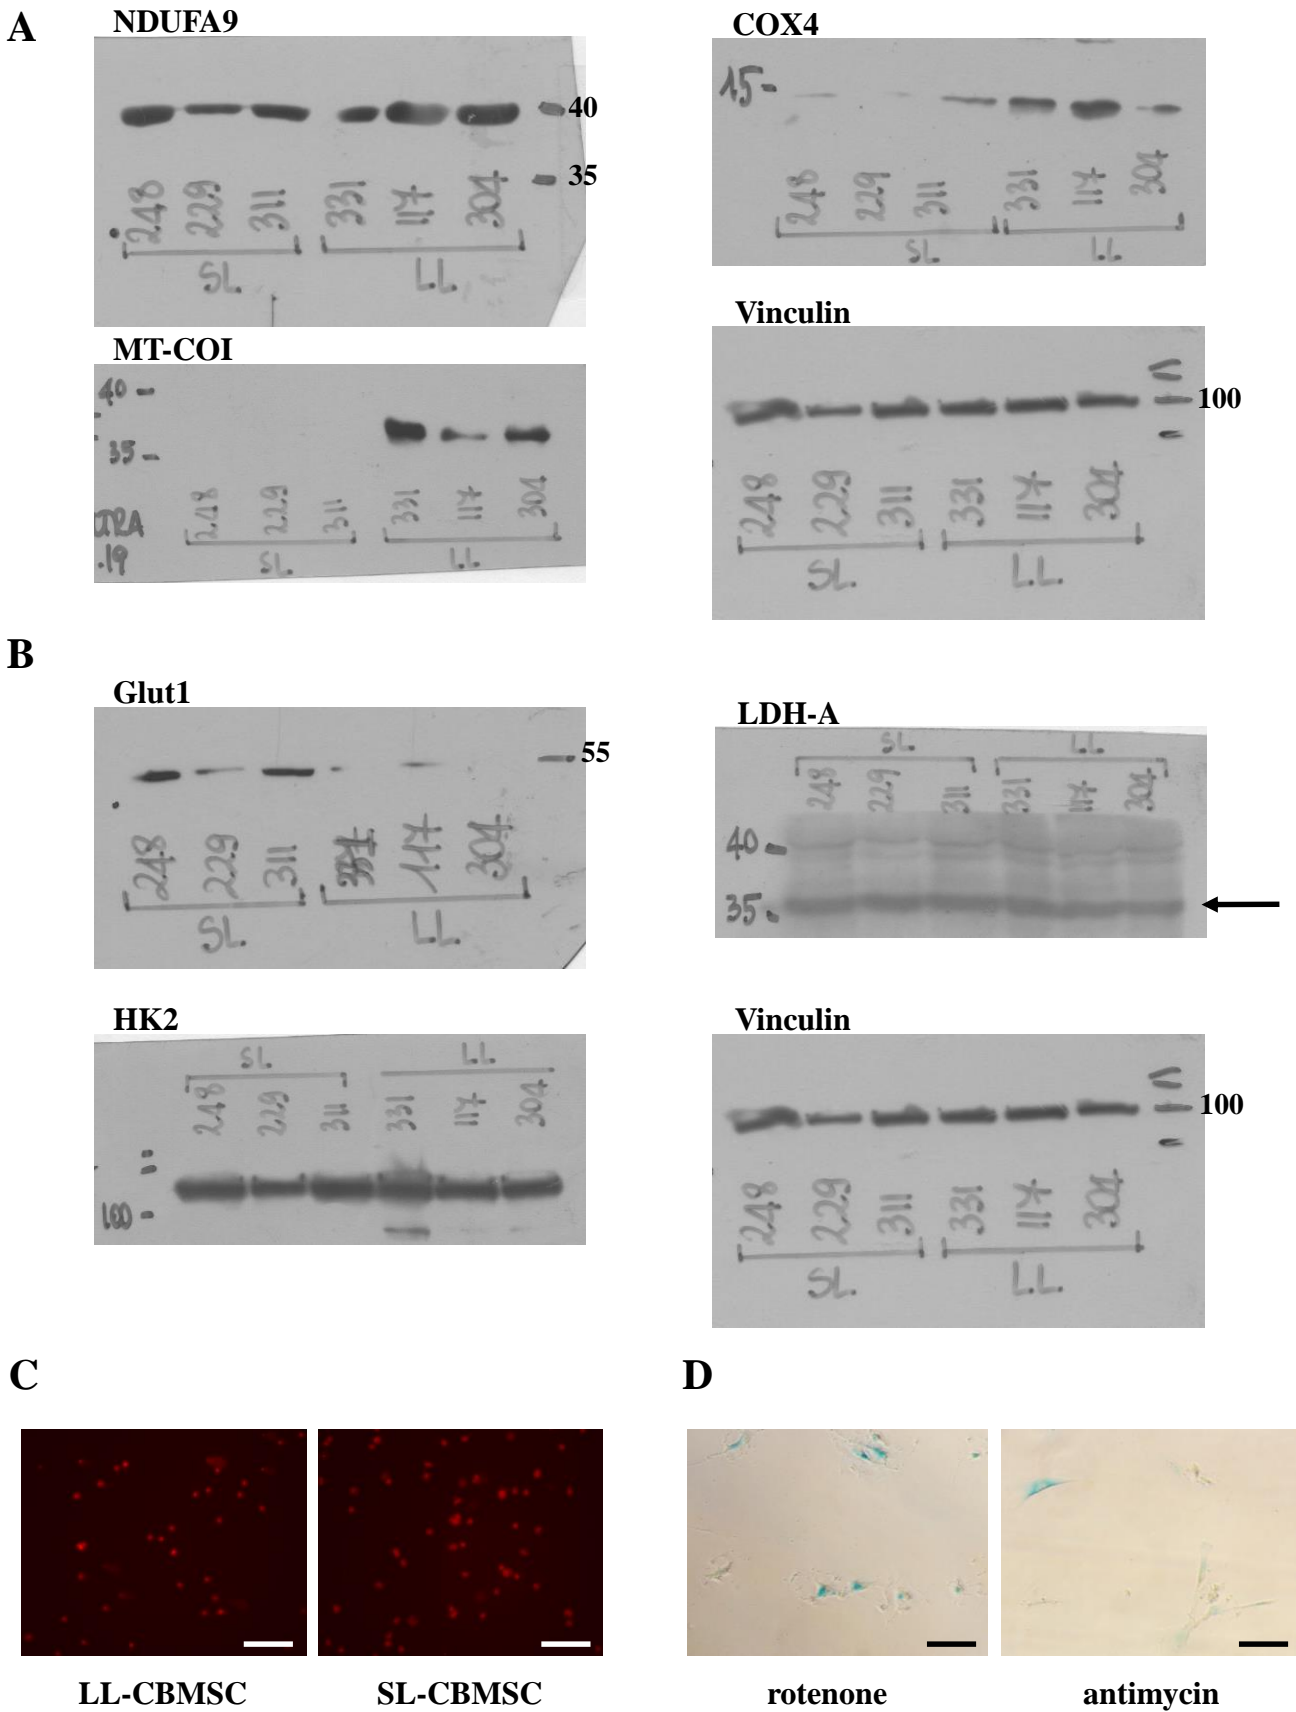

**Supplementary figure 4. SL-CBMSC as compared to LL-CBMSC show a decrease of mitochondrial OXPHOS expression and an increase of Glut1 expression.** Western blot analysis of the expression levels of the mitochondrial and glycolytic proteins. Vinculin was used to normalize the expression levels. Full scan images of immunoblots for main figures: A) mitochondrial proteins (main figure 3C); B) glycolytic proteins (main figure 4B). (C) Representative images of SCGE images for LL- and SL-CBMSC. Scale bar is 100  $\mu$ m. (D) Representative images of  $\beta$ -galactosidase-positive LL-CBMSC after mitochondrial complex I (rotenone) or complex III (antimycin A) inhibition. Scale bar is 50  $\mu$ m.



**A**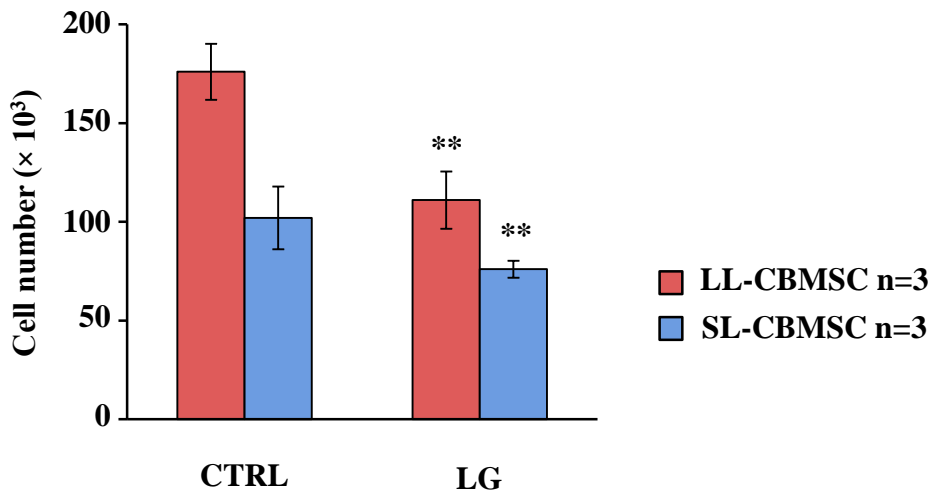**B**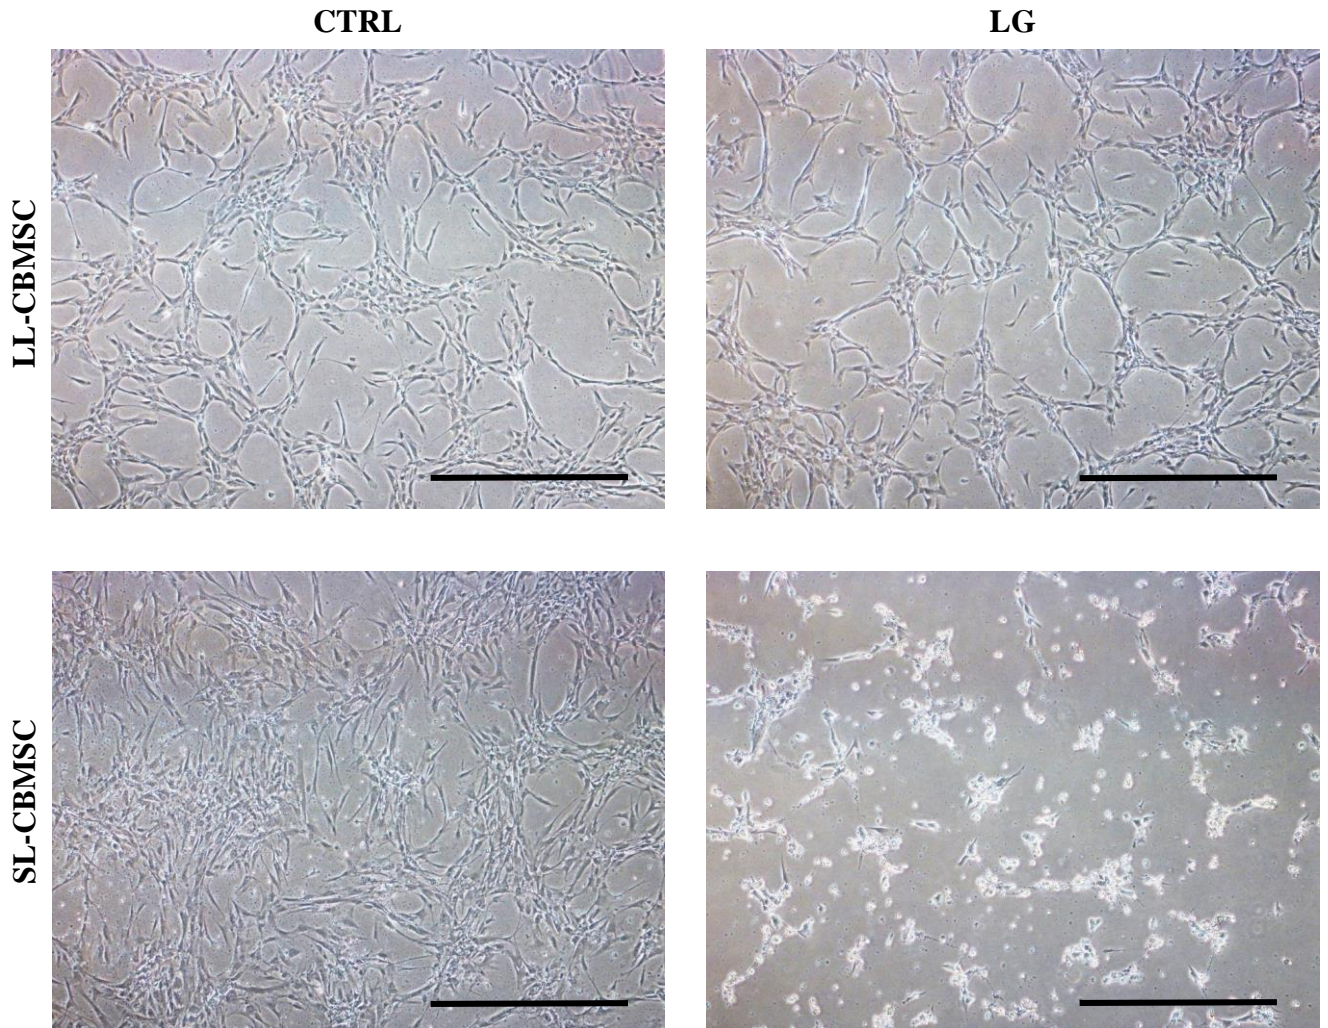

**Supplementary figure 5. Glucose shortage induced proliferation arrest in both LL- and SL-CBMSC.** (A) Cell number for LL- and SL-CBMSC after 48 hours of growth in standard conditions (CTRL) and in low glucose (LG) was assessed. \*\*p < 0.01 (Mann-Whitney test, CTRL vs. LG). Mean and standard deviation are represented. (B) Representative images of LL- and SL-CBMSC in control or low glucose culture conditions. Scale bar is 1000  $\mu$ m.



**A**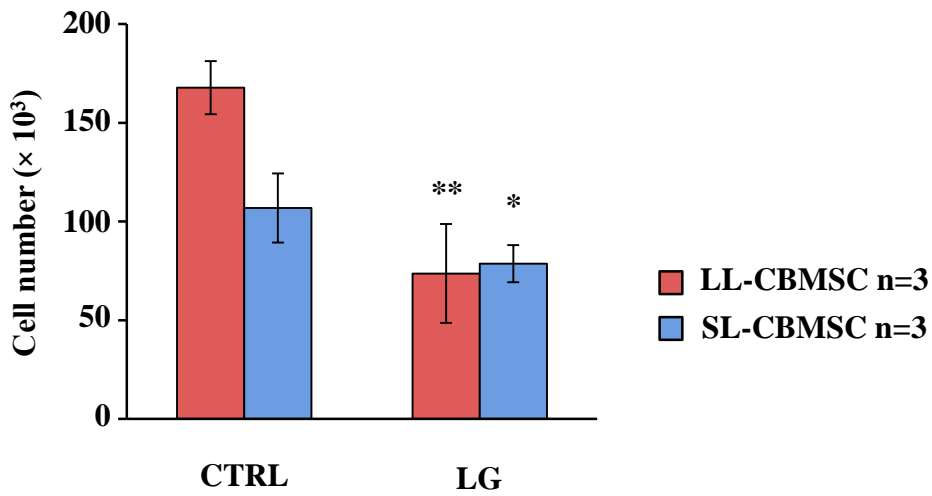**B**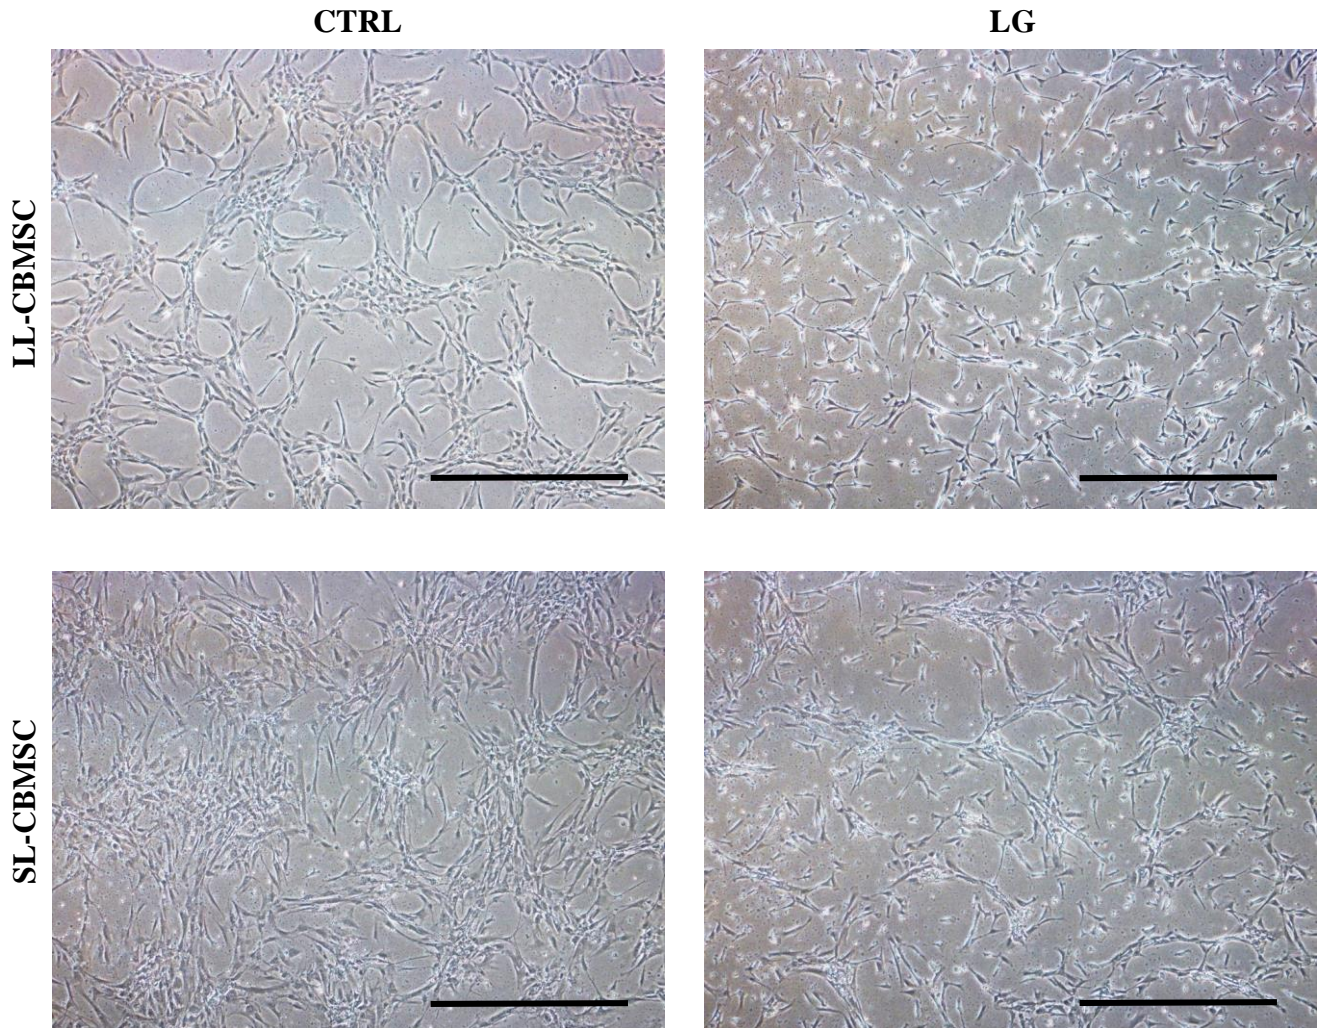

**Supplementary figure 6. Glutamine shortage induced proliferation arrest in both LL- and SL-CBMSC.** Cell number of LL- and SL-CBMSC after 48 hours of growth in standard conditions (CTRL) and in glutamine shortage (Low Gln) was addressed. \* $p < 0.05$ , \*\* $p < 0.01$  (Mann-Whitney test, CTRL vs. LG). Mean and standard deviation are represented. (B) Representative images of LL- and SL-CBMSC in control or low glutamine culture conditions. Scale bar is 1000  $\mu\text{m}$ .
